# An opinionated guide to the proper care and feeding of your transcriptome

Matthew D. MacManes<sup>1</sup>,

<sup>1</sup> Department of Molecular, Cellular and Biomedical Sciences, University of New Hampshire, Durham NH, USA

\* E-mail: [macmanes@gmail.com](mailto:macmanes@gmail.com)

⊕ Twitter: [@macmanes](https://twitter.com/macmanes)

## 1 Abstract

2 Characterizing transcriptomes in both model and non-model organisms has resulted in a  
3 massive increase in our understanding of biological phenomena. This boon, largely made  
4 possible via high-throughput sequencing, means that studies of functional, evolutionary  
5 and population genomics are now being done by hundreds or even thousands of labs  
6 around the world. For many, these studies begin with a *de novo* transcriptome assembly,  
7 which is a technically complicated process involving several discrete steps. Each step  
8 may be accomplished in one of several different ways, using different software packages,  
9 each producing different results. This analytical complexity begs the question – *Which*  
10 *method(s) are optimal?* Using reference and non-reference based evaluative methods, I  
11 propose a set of guidelines that aim to standardize and facilitate the process of transcrip-  
12 tome assembly. These recommendations include the generation of between 20 million  
13 and 40 million sequencing reads from single individual where possible, error correction of  
14 reads, gentle quality trimming, assembly filtering using **Transrate** and/or gene expres-  
15 sion, annotation using **dammit**, and appropriate reporting. These recommendations have  
16 been extensively benchmarked and applied to publicly available transcriptomes, result-  
17 ing in improvements in both content and contiguity. To facilitate the implementation  
18 of the proposed standardized methods, I have released a set of version controlled open-  
19 sourced code, The Oyster River Protocol for Transcriptome Assembly, available at  
20 <http://oyster-river-protocol.rtfid.org/>.

## 21 Introduction

22 For all biology, modern sequencing technologies has provided for an unprecedented oppor-  
23 tunity to gain a deep understanding of genome level processes that underlie a very wide

24 array of natural phenomenon, from intracellular metabolic processes to global patterns  
25 of population variability. Transcriptome sequencing has been influential, particularly in  
26 functional genomics, and has resulted in discoveries not possible even just a few years  
27 ago. This in large part is due to the scale at which these studies may be conducted.  
28 Unlike studies of adaptation based on one or a small number of candidate genes (e.g.  
29 (Fitzpatrick et al., 2005; Panhuis, 2006)), modern studies may assay the entire suite of  
30 expressed transcripts – the transcriptome – simultaneously. In addition to issues of scale,  
31 as a direct result of enhanced dynamic range, newer sequencing studies have increased abil-  
32 ity to simultaneously reconstruct and quantitate lowly- and highly-expressed transcripts,  
33 (Wolf, 2013; Vijay et al., 2013). Lastly, improved methods for the detection of differences  
34 in gene expression (e.g., Robinson et al. (2010); Love et al. (2014)) across experimental  
35 treatments has resulted in increased resolution for studies aimed at understanding changes  
36 in gene expression.

37  
38 As a direct result of their widespread popularity, a diverse toolset for the assembly  
39 and analysis of transcriptome exists. Notable amongst the wide array of tools include sev-  
40 eral for quality visualization - FastQC ([available here](#)) and SolexaQA (Cox et al., 2010),  
41 read trimming (e.g. Skewer (Jiang et al., 2014), Trimmomatic (Bolger et al., 2014) and  
42 Cutadapt (Martin, 2011)), read normalization (khmer (Pell et al., 2012)), error correction  
43 (Le et al., 2013), assembly (Trinity (Haas et al., 2013), SOAPdenovoTrans (Xie et al.,  
44 2014)), and assembly verification (Transrate (Smith-Unna et al., 2015)), BUSCO (Simão et al.,  
45 2015), and RSEM-eval (Li et al., 2014)). The ease with which these tools may be used to  
46 produce transcriptome assemblies belies the true complexity underlying the overall pro-  
47 cess. Indeed, the subtle (and not so subtle) methodological challenges associated with  
48 transcriptome reconstruction may result in highly variable assembly quality. Amongst  
49 the most challenging include isoform reconstruction and simultaneous assembly of low-  
50 and high-coverage transcripts (Modrek et al., 2001; Johnson et al., 2003), which together  
51 make accurate transcriptome assembly technically challenging. As in child rearing, pro-  
52 duction of a respectable transcriptome sequence requires a large investment in time and  
53 resources. At every step in development, care must be taken correct, but not overcorrect.  
54 Here, I propose a set of guidelines for the care and feeding that will result in the produc-  
55 tion of an accurate, useful, and well-adjusted transcriptome.

56  
57 In particular, I focus my efforts on the early- and mid-development of the transcrip-

58 tome – which, unfortunately are steps often neglected or abused – and reporting. Par-  
59 ticularly flagrant are abuses related to the selection and quality control of input data,  
60 and lack of appropriate post-assembly quality evaluation. Here, I aim to define a set of  
61 evidence based analyses and methods aimed at improving transcriptome assembly, which  
62 in turn has significant effects on all downstream analyses.

63

## 64 Methods

65 To demonstrate the merits of my recommendations, a large number of assemblies were  
66 produced using a variety of methods. For all assemblies performed, Illumina sequencing  
67 adapters were removed from both ends of the sequencing reads, as were nucleotides with  
68 quality Phred  $\leq 2$ , using the program `Trimmomatic` version 0.32 (Bolger et al., 2014). The  
69 reads were assembled using Trinity release 2.1.1 (Haas et al., 2013) using default settings.  
70 `Trinity` was used as the default assembler as it has been previously reported to be best  
71 in class (Li et al., 2014; Smith-Unna et al., 2015). Assemblies were characterized using  
72 `Transrate` version 1.0.1 (Smith-Unna et al., 2015). Using this software, I generated three  
73 kinds of metrics: contig metrics; mapping metrics which used as input the same reads  
74 that were fed into the assembler for each assembly; and comparative metrics which used  
75 as input the *Mus musculus* version 75 transcriptome. In addition to the metrics provided  
76 by `Transrate`, I evaluated completeness of each assembly by use of BUSCO, a software  
77 package that searches for highly conserved, near-universal, single copy orthologs.

78

79 To understand the influence of read depth on assembly quality, I produced subsets of  
80 size 1,2,5,10,20,40,60,80,100 million paired end reads of two publicly available paired-end  
81 datasets - A *Mus* dataset -SRR797058 described in Macfarlan et al. (2012) and a human  
82 dataset - SRR1659968. The subsampling procedure was accomplished via the software  
83 package `seqtk` (<https://github.com/lh3/seqtk>). For the evaluation of the effects of  
84 sequence polymorphism on assembly quality, I use reads from BioProject PRJNA157895  
85 described in Macmanes and Lacey (2012), a *Ctenomys* dataset which consists of 10 read  
86 files from the hypothalami of 10 different individuals. This dataset was assembled two  
87 ways. First, the reads from all 10 individuals were jointly assembled in one large assem-  
88 bly [CODE]. This assembly was compared to the assembly of a single individual [CODE].  
89 Assemblies were generated and evaluated as per above.

90

91 To evaluate the effects of error correction, I used the subsampled read datasets, which  
92 were subsequently error corrected using the following software packages: SEECER ver-  
93 sion 0.1.3 (Le et al., 2013), Lighter version 1.0.7 (Song et al., 2014), SGA version 0.10.13  
94 (Simpson and Durbin, 2012), bfc version r177 (Li, 2015), RCorrector (Song and Florea,  
95 2015), and BLESS version 0.24 (Heo et al., 2014). In correction algorithms (SGA, BLESS,  
96 bfc) that allowed for the use of larger *kmer* lengths, I elected to error correct with a small  
97 ( $k = 31$ ) and a long ( $k = 55$ ) *kmer*, while for the other software (RCorrector, SEECER  
98 and Lighter) that does not allow for longer *kmer* values, I set  $k = 31$ . bfc requires  
99 interleaved reads, which was accomplished using khmer version 2.0 (Brown et al., 2015,  
100 2012; McDonald and Brown, 2013). Code for performing these steps is available [\[here\]](#).

101

102 The effects of khmer digital normalization (Pell et al., 2012) were characterized by  
103 generating three 20 million, 40 million, and 80 million read subsets of the larger *Mus*  
104 dataset. Digital normalization was performed using a median kmer abundance threshold  
105 of 30. The resulting datasets were assembled using Trinity, and evaluated using BUSCO  
106 and Transrate. Code for performing these steps is available in the `diginorm` target of  
107 the [\[Makefile\]](#).

108

109 Post-assembly processing was evaluated using several assembly datasets of various  
110 sizes, generated above. Each assembly was evaluated using Transrate. Transrate pro-  
111 duces a score based on contig and mapping metrics, as well as a more optimal assembly  
112 where poorly supported contigs (putative assembly artifacts) are removed. Both the origi-  
113 nal and Transrate optimal assembly are evaluated using BUSCO, to help better understand  
114 if filtration results in the loss of non-artifactual transcripts. In addition to Transrate fil-  
115 tration, an additional, or alternative filtration step is performed using estimates of gene  
116 expression (TPM=transcripts per million). TPM is estimated by two different software  
117 packages that implement two distinct methods - Salmon (Patro et al., 2015) and Kallisto  
118 (Bray et al., 2015). Transcripts whose expression is estimated to be greater than a given  
119 threshold, typically TPM=1 or TPM=0.5 are retained. As above, the filtered assemblies  
120 are evaluated using BUSCO, to help better understand if filtration results in the loss of  
121 non-artifactual transcripts. Code for performing these steps is available in the `QC` target  
122 of the makefile available [\[here\]](#).

123

## 124 Recommendations

### 125 0.1 Input Data

126 **Summary Statement: Sequence 1 or more tissues from 1 individual to a depth**  
127 **of between 20 million and 40 million 100bp or longer paired-end reads.**

128 When planning to construct a transcriptome, the first question to ponder is the type  
129 and quantity of data required. While this will be somewhat determined by the specific  
130 goals of the study and availability of tissues, there are some general guiding principals.  
131 As of 2014, Illumina continues to offer the most flexibility in terms of throughout, ana-  
132 lytical tractability, and cost (GLENN, 2011). It is worth noting however, that long-read  
133 (e.g. PacBio) transcriptome sequencing is just beginning to emerge as an alternative  
134 (Au et al., 2013), particularly for researchers interested in understanding isoform com-  
135 plexity. Though currently lacking the throughput for accurate quantitation of gene ex-  
136 pression, long read technologies, much like they have done for *de novo* genome assembly,  
137 seem likely to replace short-read-based *de novo* transcriptome assembly at some point in  
138 the future.

139  
140 For the typical transcriptome study, one should plan to generate a reference based  
141 on 1 or more tissue types, with each tissue adding unique tissue-specific transcripts and  
142 isoforms. Though increasing the amount of sequence data collected does increase the accu-  
143 racy and completeness of the assembly (Figure 1, 3) albeit marginally, a balance between  
144 cost and quality exists. For the datasets examined here (mammal tissues), sequencing  
145 more than between 20M and 40M paired-end reads is associated with the discovery of  
146 very few additional transcripts, and only minor improvement in other assembly metrics.  
147 Read length should be at least 100bp, with longer reads likely aiding in isoform recon-  
148 struction and contiguity (Garber et al., 2011).

149  
150 Because sequence polymorphism increases the complexity of the *de bruijn* graph  
151 (Iqbal et al., 2012; Studholme, 2010), and therefore may negatively effect the assembly  
152 itself, the reference transcriptome should be generated from reads corresponding to as ho-  
153 mogeneous a sample as possible. For outbred, non-model organisms, this usually means  
154 generating reads from a single individual. When more then one individual is required to

155 meet other requirements (e.g. number of reads or experimental treatment conditions),  
156 keeping the number of individuals to a minimum is paramount. For instance, when  
157 performing an experiment where a distinct set of genes may be expressed in different  
158 treatments (or sexes), the recommendation is to sequence one individual from each treat-  
159 ment class.

160

161 To illustrate this effect, I examined the effects of assembling reads from 10 individuals  
162 jointly, versus assembling a representative individual. This individual was selected based  
163 on having the highest number of reads. The individual assembly of 38 million paired end  
164 read took approximately 23 hours and 20Gb of RAM, while the joint assembly took five  
165 days and 150Gb of RAM. Per Table 1, the joint assembly used more than eight times more  
166 reads, and is more than four times larger than the assembly of a single individual. Despite  
167 the additional read data, the **Transrate** score is markedly decreased, although the BUSCO  
168 statistics are slightly better. The large joint assembly suffers from major structural prob-  
169 lems that are unfixable via the proposed filtering procedures. Specifically, read-mapping  
170 data suggests that 28.7% of the contigs in the joint assembly could be merged, versus 15%  
171 in the single assembly. This structural problem is likely the result of sequence polymor-  
172 phism and may cause significant issues for many common downstream processes.

173

174 **Table 1**

175

|     | <b>Name</b>        | <b>Num. Reads</b> | <b>Num. Contigs</b> | <b>Assembly Size</b> | <b>Score</b> | <b>BUSCO</b>     |
|-----|--------------------|-------------------|---------------------|----------------------|--------------|------------------|
| 176 | <b>Single Ind.</b> | 38M               | 205812              | 131.6Mb              | 0.3064       | C:81%,D:41%,M:9% |
|     | <b>10 Ind.</b>     | 269M              | 913295              | 440.2Mb              | 0.22011      | C:88%,D:51%,M:5% |

177 Table 1. A comparison of the raw assemblies resulting from a single individuals  
178 versus the joint assembly of 10 individuals. The individual assembly of 38 million  
179 reads resulted in an assembly of size 131.6 million bases, a **Transrate** score of  
180 0.3064. 81% of BUSCOs were found to be complete, with 9% missing from the  
181 dataset. The joint assembly of 10 individuals, consisting of 269 million paired-end  
182 reads resulted in an assembly of size 440.2 million bases and a **Transrate** score of  
183 0.22011.

184

Figure 1

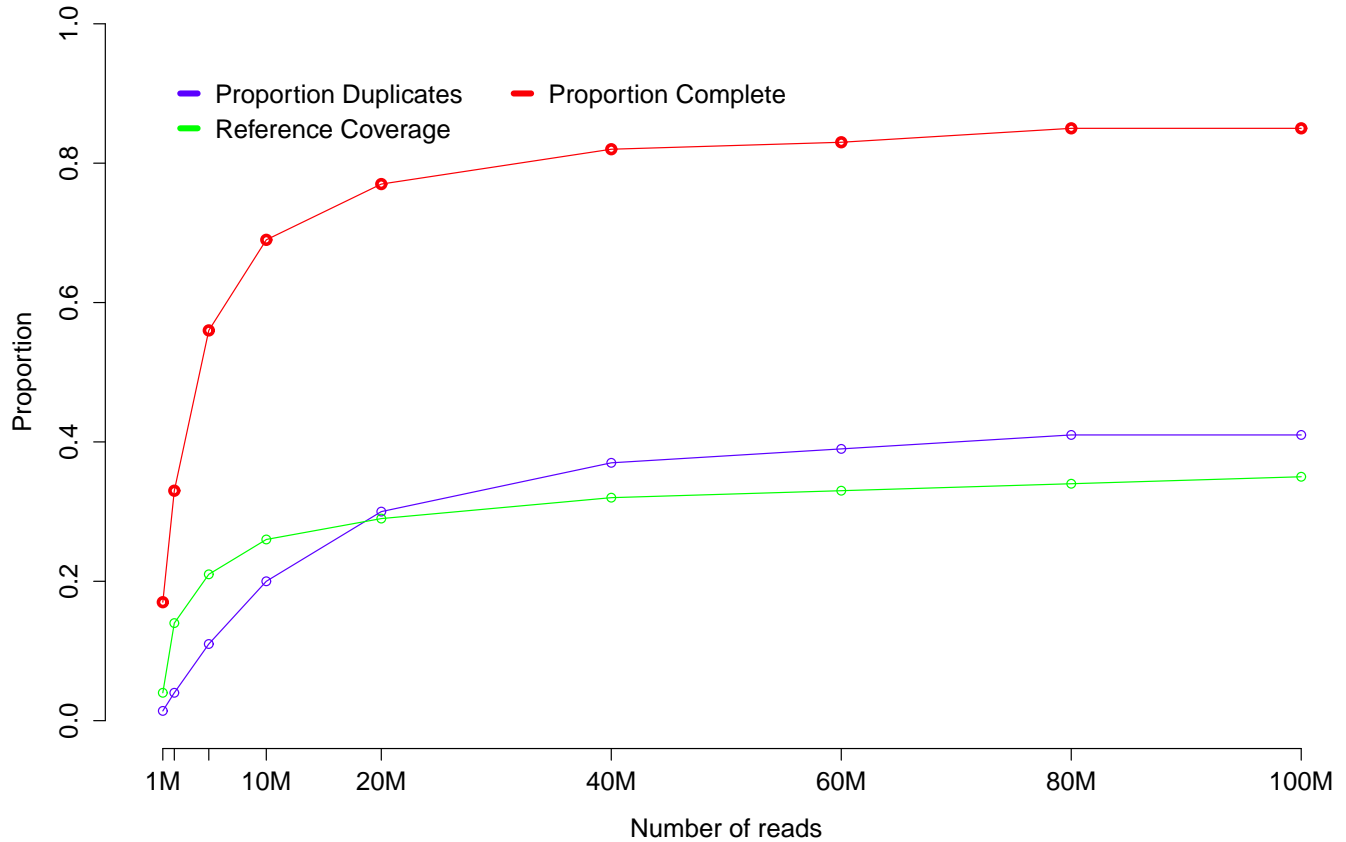

185

186 Figure 1. Assembly of multiple subsetting datasets suggests that sequencing beyond  
187 20-40 million paired end reads does not result in further sequence discovery. Pro-  
188 portion complete indicates the proportion of BUSCOs that were found to be full  
189 length. Proportion duplicates are those BUSCOs that were found multiple times  
190 in the assembly dataset. Reference coverage is a *Transrate* generated metric in-  
191 dicating the proportion of the reference *Mus* transcriptome found in the *de novo*  
192 assembly. Higher numbers for reference coverage and proportion complete indicate  
193 a more complete assembly.

## 194 0.2 Quality Control of Sequence Read Data

195 **Summary Statement:** Visualize your read data. Error correct reads using  
196 `bfc` for low to moderately sized datasets and `RCorrector` for higher coverage  
197 datasets. Remove adapters, and employ gentle quality filtering using PHRED  
198  $\leq 2$  as a threshold.

199 Before assembly, it is critical that appropriate quality control steps are implemented.  
200 It is often helpful to generate some metrics of read quality on the raw data. Several  
201 software packages are available – I am fond of `SolexaQA` (Cox et al., 2010) and `FastQC`.  
202 Immediately upon download of the read dataset from the sequence provider, metrics of  
203 read quality, generated by either of these two software packages, should be generated.  
204 Of note – a copy of the raw reads should be compressed and archived, preferably on a  
205 physically separated device for long term archival storage. For this, I have successfully  
206 used Amazon S3 cloud storage, though many options exist.

207  
208 Immediately after visualizing the raw data, error correction of the sequencing reads  
209 should be done (MacManes and Eisen, 2013). A very large number of read correction  
210 software packages exist, and several of them are benchmarked here using the *Mus* (Figure  
211 2, and Tables S1-S11) and *Homo* datasets (Tables S12-S21). In all evaluated datasets, the  
212 error correction `bfc` was the best when correcting less than approximately 20M paired-end  
213 reads. When correcting more, the software `RCorrector` provided the optimal correction.  
214 The effects of error correction on assembly were evaluated using `BUSCO` and `Transrate`.  
215 While error correction did not result in significant improvements in `BUSCO` metrics, the  
216 `transrate` scores were substantially improved (Figure 3). These scores were largely im-  
217 proved by the fact that assemblies using error corrected reads had fewer low-covered based  
218 and contigs, and a slightly higher mapping rate.

219  
220 The error corrected reads are then subjected to vigorous adapter sequence removal,  
221 typically using `Trimmomatic` (Bolger et al., 2014) or `Skewer` (Jiang et al., 2014). With  
222 adapter sequence removal may be a quality trimming step. Here, substantial caution is  
223 required, as aggressive trimming has detrimental effects on assembly quality (MacManes,  
224 2014). Specifically, I recommend trimming at Phred=2, a threshold associated with re-  
225 moval of only the lowest quality bases. After adapter removal and quality trimming, the



226 previously error corrected reads are now ready for *de novo* transcriptome assembly.

227

228 **Figure 2**

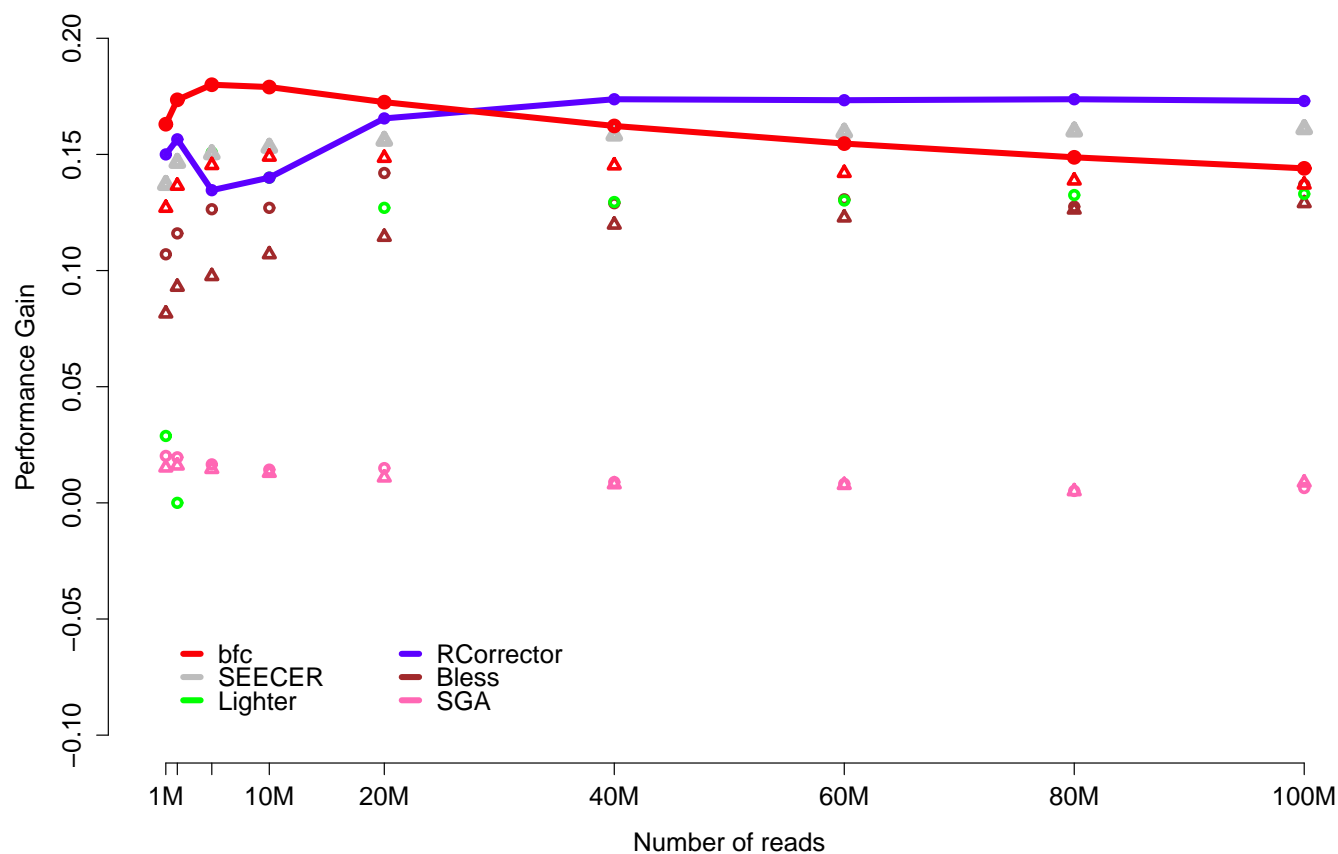

229

230 Figure 2. Error correction of reads results in a performance gain (defined as: (perfect  
231 error corrected reads - perfect raw reads) + reads made better - reads made worse).  
232 Perfect reads are reads that map to the reference without mismatch. Better and  
233 worse reads are those that map with fewer or more mismatches. Low coverage  
234 datasets are best corrected with **bfc**, which higher coverage datasets are optimally  
235 corrected with **RCorrector**. The best performing corrections improve the quality  
236 of more than 15% of reads.

237

Figure 3

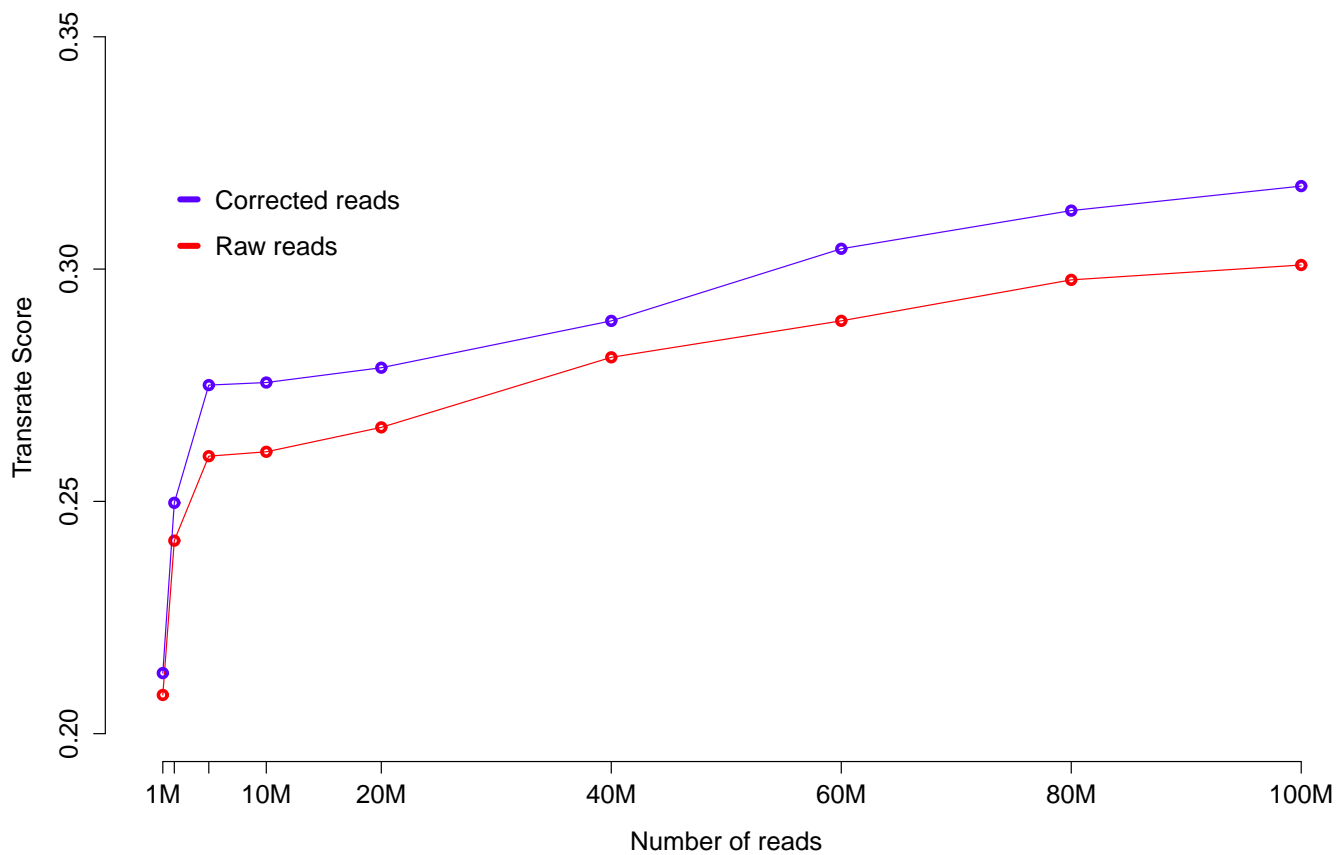

238

239 Figure 3. Error correction (with the best performing correction software, described  
240 in Figure 2), results in a consistent increase in the Transrate score, which indicates  
241 a higher quality assembly across all coverage depths.

### 242 0.3 Coverage normalization

243 **Summary Statement: Normalize your data, only if you have to.**

244 Depending on the volume of input data, the availability of a high-memory worksta-  
245 tion, and the rapidity with which the assembly is needed, coverage normalization may  
246 be employed. This process, which, using a streaming algorithm and measurement of the  
247 median kmer abundance of each read, aims to erode areas of high coverage while leaving  
248 untouched, reads spanning lower coverage areas. Normalization may be accomplished in  
249 the software package `khmer` (Pell et al., 2012), or within `Trinity` using a computational  
250 algorithm based on `khmer`. In our tests, normalization did dramatically reduce RAM re-  
251 quirements and runtime, though it also decreased the number of complete BUSCO's found  
252 by 4%, and the transrate score from 0.266 to 0.251. Given this, our recommendation is  
253 to employ digital normalization when the assembly is otherwise impossible, or when re-  
254 sults are urgently needed, but that it should not be used by default for the production of  
255 transcriptome assemblies.

256

### 257 0.4 Assembly

258 **Summary Statement: Assemble your data using Trinity, then remove poorly**  
259 **supported contigs.**

260 For non-model organisms lacking reference genomic resources, the error correction,  
261 adapter and quality trimming reads should be assembled *de novo* into transcripts. Cur-  
262 rently, the assembly package `Trinity` (Haas et al., 2013) is thought to currently be the  
263 most accurate (Li et al., 2014), and therefore is recommended over other assemblers.  
264 While attempting a merged assembly with multiple assemblers may *ultimately* result in  
265 the highest quality assembly, options for merging assemblies are currently limited, and  
266 therefore is not recommended.

267

268 `Trinity`'s underlying algorithm have been pre-optimized to recover large numbers of  
269 alternative isoforms, including many that are minimally supported by read data. As a  
270 result, in many cases, the raw assembly will require filtration to remove these assembly

271 artifacts. Reference dependent and independent evaluative tools (*e.g.*, **Transrate**, **BUSCO**)  
272 allow for evidence-based post-assembly filtration. Typically, an initial quality-evaluation  
273 and filtration step is implemented using **Transrate**. This process assigns a score to the  
274 assembly, and creates an alternative assembly by removing contigs based on read-mapping  
275 metrics. This filtration step may result in the removal of a large proportion (as much as  
276 67%) of the transcripts. Reference-based metrics are generated before and after this filtra-  
277 tion step to ensure that filtration has not been too aggressive - that a significant number  
278 of known transcripts have not been removed. After **Transrate** filtration, or alternative  
279 to it, it is often helpful to employ a filtration step based on TPM. Because underlying  
280 assumptions of gene expression estimation software vary, which may results in variation in  
281 the actual estimates, gene expression is typically estimated using two different packages,  
282 **Salmon** and **Kallisto**. Transcripts whose expression is less than either 1 or 0.5 are re-  
283 moved. Again, reference-based metrics are generated to ensure that a significant number  
284 of known transcripts are not removed.

285

286 The results of filtration on several datasets of varying size are presented in Table 2.  
287 The reads used in the 1M,5M,10M,20M subset assemblies were corrected with **bfc**, while  
288 the reads for the larger assemblies were corrected with **RCorrector**. Each dataset was  
289 trimmed to a quality of Phred <2, and assembled with **Trinity**. The raw assembly was  
290 filtered by **Transrate** and by gene expression. **BUSCO** evaluation was performed before  
291 and after these filtration steps. In general, for low coverage datasets (less than 20 million  
292 reads), filtering based on expression, using TPM=1 as a threshold performs well, with  
293 **Transrate** filtering being too aggressive. With higher coverage data (more than 60 mil-  
294 lion reads) **Transrate** filtering may be optimal, as may gene expression filtering using a  
295 threshold of TPM=0.5.

296

| Name           | Subset | BUSCO                      | Num. Contigs | Assembly Size | Transrate Score |
|----------------|--------|----------------------------|--------------|---------------|-----------------|
| Raw            | 1M     | C:17%[D:1.4%],F:10%,M:72%  | 29719        | 9.8Mb         | 0.21274         |
| Transrate_Filt | 1M     | C:16%[D:1.2%],F:8.2%,M:75% | 9860         | 9.1Mb         | 0.31918         |
| TPM_Filt       | 1M     | C:17%[D:1.4%],F:10%,M:72%  | 29503        | 9.8Mb         | 0.21683         |
| Raw            | 5M     | C:56%[D:13%],F:9.8%,M:33%  | 52611        | 35.3Mb        | 0.27401         |
| Transrate_Filt | 5M     | C:52%[D:11%],F:9.2%,M:38%  | 21383        | 31.1Mb        | 0.39856         |
| TPM_Filt       | 5M     | C:56%[D:12%],F:10%,M:33%   | 51476        | 33.9Mb        | 0.28302         |
| Raw            | 10M    | C:69%[D:23%],F:7.0%,M:23%  | 72688        | 52.8Mb        | 0.27558         |
| Transrate_Filt | 10M    | C:64%[D:20%],F:6.3%,M:29%  | 28249        | 44.7Mb        | 0.4092          |
| TPM_Filt       | 10M    | C:69%[D:21%],F:7.0%,M:23%  | 69561        | 49.2Mb        | 0.2881          |
| Raw            | 20M    | C:78%[D:32%],F:4.5%,M:17%  | 108072       | 76.2Mb        | 0.27888         |
| Transrate_Filt | 20M    | C:70%[D:27%],F:4.7%,M:24%  | 45169        | 62.1Mb        | 0.39389         |
| TPM_Filt       | 20M    | C:77%[D:29%],F:4.8%,M:17%  | 97519        | 66.8Mb        | 0.29878         |
| Raw            | 40M    | C:82%[D:38%],F:3.7%, M:14% | 163561       | 107Mb         | 0.2859          |
| Transrate_Filt | 40M    | C:74%[D:32%],F:4%, M:21%   | 91367        | 85.5Mb        | 0.3796          |
| TPM_Filt       | 40M    | C:82%[D:32%],F:3.6%, M:14% | 117819       | 83.3Mb        | 0.3037          |
| Raw            | 60M    | C:84%[D:40%],F:3.2%,M:12%  | 204040       | 127Mb         | 0.29616         |
| Transrate_Filt | 60M    | C:78%[D:35%],F:3.2%,M:18%  | 166503       | 107Mb         | 0.37018         |
| TPM_Filt       | 60M    | C:82%[D:31%],F:3.3%,M:13%  | 109485       | 86.9Mb        | 0.30128         |
| Raw            | 80M    | C:85%[D:40%],F:3.2%,M:11%  | 237401       | 146Mb         | 0.30139         |
| Transrate_Filt | 80M    | C:85%[D:39%],F:3.2%,M:11%  | 222900       | 132Mb         | 0.37997         |
| TPM_Filt       | 80M    | C:82%[D:32%],F:2.9%,M:14%  | 96968        | 88.5Mb        | 0.29261         |
| Raw            | 100M   | C:85%[D:41%],F:3.0%,M:11%  | 264751       | 159Mb         | 0.30567         |
| Transrate_Filt | 100M   | C:85%[D:40%],F:3.1%,M:11%  | 247413       | 143.8Mb       | 0.39242         |
| TPM_Filt       | 100M   | C:83%[D:32%],F:2.7%,M:14%  | 86993        | 88.4Mb        | 0.2828          |

297

298 Table 2. Post-assembly filtration. Using assemblies from the 1M,5M,10M,20M,40M,60M,80M,100M read subsets,  
299 I evaluated the effects of **Transrate** and TPM filtration using a threshold of TPM=1. Both **Transrate** and TPM  
300 filtering reduced the number of contigs and assembly size, though the magnitudes were dependent on the depth  
301 of sequencing. **BUSCO** scores were either decreased in some cases, or stable in others, representing the differential  
302 effects of filtering on different sized assemblies. In general, for low coverage datasets (less than 20 million reads),  
303 filtering based on expression, using TPM=1 as a threshold performs well, with **Transrate** filtering being too  
304 aggressive. With higher coverage data (more than 60 million reads) **Transrate** filtering may perform better, as  
305 mat expression filtering with a lower threshold.

## 306 **0.5 Annotation, post-assembly quality verification, & reporting**

307 **Summary Statement: Verify the quality of your assembly using content based**  
308 **metrics. Annotate using dammit Report Transrate score, BUSCO statistics, num-**  
309 **ber of unique transcripts, etc. Do not report meaningless statistics such as**  
310 **N50.**

311 Annotation is a critically important step in transcriptome assembly. Much like other  
312 steps, numerous options exist. Though the research requirements may drive the anno-  
313 tation process, I propose that a core set of annotations be provided with all *de novo*  
314 transcriptome assembly projects. The process through which these core annotations are  
315 accomplished is coordinated by the software package **dammit**. This software takes as in-  
316 put a fasta file and outputs a standard gff3 containing annotations. After annotation, but  
317 before downstream use, it is important to assess the quality of a transcriptome. Many  
318 authors have attempted to use typical genome assembly quality metrics for this pur-  
319 pose. In particular, N50 and other length-based summary statistic are often reported  
320 (e.g. (Hiz et al., 2014; Shinzato et al., 2014; Liang et al., 2013)). However, in addition  
321 to being a poor proxy for quality in genome assembly (Bradnam et al., 2013), N50 in  
322 the context of a transcriptome assembly carries very little information because the opti-  
323 mal contig length is not known (Li et al., 2014) - real transcripts vary greatly in length,  
324 ranging from tens of nucleotides to tens of thousands of nucleotides. Reportable metrics  
325 should be chosen based on their relevance for assembly optimization given the biological  
326 question at hand. In most cases, this means maximizing the number of transcripts that  
327 can be confidently attributed to the organism, while minimizing the number of technical  
328 artifacts related to the process of sequencing, quality control, and assembly. For many re-  
329 searchers, this means evaluation with both **BUSCO** and **Transrate**. The statistics found in  
330 Table 1 should be presented for all assemblies, with additional information supplementing  
331 these core vital statistics as needed.

332

## 333 **Testing the Oyster River Protocol**

334 To evaluate the Oyster River Protocol for Transcriptome Assembly, I selected three  
335 publicly available Illumina RNAseq datasets and their corresponding assembled tran-

336 scriptomes. These three assemblies included the Nile Tilapia, *Oreochromis niloticus*  
337 (Zhang et al. (2013), SRR797490), an unpublished study of the Mediterranean black  
338 widow, *Latrodectus tredecimguttatus* (SRR954929), and lastly a work on *Delia antiqua*  
339 (Guo et al. (2015), SRR916227). I analyzed the original transcriptomes using both BUSCO  
340 and **Transrate**, then followed the protocol as described [here](#). Code for data analysis of  
341 the *Oreochromis* is available [here](#). The other samples were processed in an identical fash-  
342 ion. The application of the Oyster River Protocol on these datasets resulted universally  
343 in a substantial (as much as 22%) improvement in the completeness of assemblies. Given  
344 a major goal of these types of studies includes reconstruction all expressed genes, this  
345 improvement may have substantial improvement on downstream work. The **Transrate**  
346 score was dramatically improved as well, particularly in the *Oreochromis* and *Delia* as-  
347 semblies. This improvement speaks to the improvement of the structure of the assembly.

348

349 The filtering process through which these more optimal assemblies were is key. Evalu-  
350 ating both the BUSCO and **Transrate** scores before and after, allows for an objective way  
351 to decide if filtering has been too restrictive or not. Indeed, for the *Latrodectus* assembly,  
352 both **Transrate** and TPM filtering reduced the BUSCO score, while substantially increas-  
353 ing the **Transrate** score. Depending on the goals of the experiment, it may be determined  
354 that the structural integrity of the assembly outweighs improved content. In contrast to  
355 how post-assembly filtering is typically done, this method allow for the researcher to make  
356 an informed decision about these processes.



357  
358

Table 3

| Name        | Number Reads | Number Contigs                   | Assembly Size (Mb)       | Transrate Score                    | BUSCO Score                                                 |
|-------------|--------------|----------------------------------|--------------------------|------------------------------------|-------------------------------------------------------------|
| Oreochromis | 25.2M        | 79198/140035/100376/116038/88456 | 32.0/75.1/69.5/58.6/57.7 | 0.1103/0.2173/0.4778/0.2595/0.4479 | C:39%,M:46%/C:58%,M:28%/C:57%,M:30%/C:57%,M:30%/C:56%,M:31% |
| Latrodectus | 27.6M        | 10259/36394/30932/27973/NA       | 10.6/13.5/13.1/10.9/NA   | 0.43673/0.2795/0.4968/0.338/NA     | C:48%,M:38%/C:58%,M:28%/C:46%,M:39%/C:46%,M:41%/NA          |
| Delia       | 25.8M        | 29451/49099/38614/46145/32689    | 12.4/19.3/18.8/17.9/15.8 | 0.393/0.2036/0.4572/0.2305/0.4341  | C:40%,M:48%/C:62%,M:21%/C:61%,M:23%/C:61%,M:23%/C:61%,M:25% |

360 Table 3. The results of the application of the Oyster River Protocol to three available transcriptomes. Within  
 361 each column, the 5 metrics, separated by forward slashes are: 1. The original assembly 2. The raw Trinity  
 362 assembly 3. The Transrate filtered assembly 4. The TPM=1 filtered assembly, and 5. The Transrate filtered  
 363 assembly that has been further filtered by expression. In all cases the assembly content, as evaluated by the BUSCO  
 364 score is dramatically improved over the original assembly. These content-improved assemblies have acceptable  
 365 Transrate scores, which in 2 of 3 cases are vastly superior to the scores of the original assembly.

## 366 Conclusions

367 With the rapid adoption of high-throughput sequencing, studies of functional, evolution-  
368 ary and population genomics are now being done by hundreds or even thousands of labs  
369 around the world. These studies typically begin with a *de novo* transcriptome assem-  
370 bly. Assembly may be accomplished in one of several different ways, using different soft-  
371 ware packages, with each method producing different results. This complexity begs the  
372 question – *Which method(s) are optimal?* Using reference and non-reference based eval-  
373 uative methods, I have proposed a set of guidelines **The Oyster River Protocol for**  
374 **Transcriptome Assembly** that aim to standardize and facilitate the process of transcrip-  
375 tome assembly. These recommendations include limiting assembly to between 20 million  
376 and 40 million sequencing reads from single individual where possible, error correction  
377 of reads, gently quality trimming, assembly filtering using **Transrate** or gene expression,  
378 annotation using **dammit**, and appropriate reporting. The processes result in a high qual-  
379 ity transcriptome assembly appropriate for downstream usage. Assemblies generated in  
380 the process of developing this protocol are available [here](#).

## 381 Acknowledgments

382 This work was significantly impacted by numerous discussions with C. Titus Brown,  
383 Richard Smith-Unna, Camille Scott, and many others. More generally, the work and it's  
384 presentation has been influenced by supporters of the Open Access and Science move-  
385 ments.

## 386 References

- 387 Au, K. F., Sebastiano, V., Afshar, P. T., Durruthy, J. D., Lee, L., Williams, B. A.,  
388 van Bakel, H., Schadt, E. E., Reijo-Pera, R. A., Underwood, J. G., and Wong, W. H.  
389 (2013). Characterization of the human ESC transcriptome by hybrid sequencing. *PNAS*,  
390 110(50):201320101–30.
- 391 Bolger, A. M., Lohse, M., and Usadel, B. (2014). Trimmomatic: a flexible trimmer for  
392 Illumina sequence data. *Bioinformatics*, 30(15):btu170–2120.
- 393 Bradnam, K. R., Fass, J. N., Alexandrov, A., Baranay, P., Bechner, M., Birol, I., Boisvert,

- 394 S., Chapman, J. A., Chapuis, G., Chikhi, R., Chitsaz, H., Chitsaz, H., Chou, W.-C.,  
395 Corbeil, J., Del Fabbro, C., Docking, T. R., Durbin, R., Earl, D., Emrich, S., Fedotov,  
396 P., Fonseca, N. A., Ganapathy, G., Gibbs, R. A., Gnerre, S., Gnerre, S., Godzaridis, E.,  
397 Goldstein, S., Haimel, M., Hall, G., Haussler, D., Hiatt, J. B., Ho, I. Y., Hiatt, J. B.,  
398 Hunt, M., Howard, J., Hunt, M., Jackman, S. D., Jaffe, D. B., Jaffe, D. B., Jiang, H.,  
399 Jarvis, E. D., Kazakov, S., Kazakov, S., Kersey, P. J., Kersey, P. J., Kitzman, J. O.,  
400 Kitzman, J. O., Koren, S., Knight, J. R., Koren, S., Lam, T.-W., Lavenier, D., Lavenier,  
401 D., Laviolette, F., Li, Y., Laviolette, F., Li, Z., Li, Y., Liu, B., Liu, B., Liu, Y., Liu,  
402 Y., Maccallum, I., Luo, R., Maccallum, I., MacManes, M. D., Maillet, N., Melnikov,  
403 S., Naquin, D., Ning, Z., Ning, Z., Otto, T. D., Otto, T. D., Paten, B., Paulo, O. S.,  
404 Paulo, O. S., Phillippy, A. M., Pina-Martins, F., Place, M., Place, M., Przybylski, D.,  
405 Przybylski, D., Qin, X., Qu, C., Ribeiro, F. J., Richards, S., Richards, S., Rokhsar,  
406 D. S., Ruby, J. G., Scalabrin, S., Schatz, M. C., Schwartz, D. C., Sergushichev, A.,  
407 Sergushichev, A., Sharpe, T., Sharpe, T., Shaw, T. I., Shaw, T. I., Shendure, J., Shi,  
408 Y., Simpson, J. T., Song, H., Song, H., Tsarev, F., Tsarev, F., Vezzi, F., Vicedomini,  
409 R., Wang, J., Vieira, B. M., Worley, K. C., Wang, J., Worley, K. C., Yin, S., Yiu,  
410 S.-M., Yin, S., Yuan, J., Yiu, S.-M., Yuan, J., Zhang, G., Zhang, H., Zhou, S., and  
411 Korf, I. F. (2013). Assemblathon 2: evaluating *de novo* methods of genome assembly  
412 in three vertebrate species. *GigaScience*, 2(1):10.
- 413 Bray, N., Pimentel, H., Melsted, P., and Pachter, L. (2015). Near-optimal RNA-Seq  
414 quantification. *arXiv.org*.
- 415 Brown, C. T., Alameldin, H. F., Brown, C. T., Awad, S., Crusoe, M. R., Boucher, E.,  
416 Edverson, G., Fish, J., Caldwell, A., Howe, A., Cartwright, R., Charbonneau, A.,  
417 McDonald, E., Constantinides, B., Nahum, J., Fay, S., Fenton, J., Pell, J., Fenzl, T.,  
418 Scott, C., Garcia-Gutierrez, L., Garland, P., Gluck, J., González, I., Guermond, S.,  
419 Guo, J., Gupta, A., Herr, J. R., Howe, A., Hyer, A., Härpfer, a., Irber, L., Kidd, R.,  
420 Lin, D., Lippi, J., Mansour, T., McA’Nulty, P., Mizzi, J., Murray, K. D., Nahum, J. R.,  
421 Nanlohy, K., Nederbragt, A. J., Ortiz-Zuazaga, H., Ory, J., Pell, J., Pepe-Ranney,  
422 C., Russ, Z. N., Schwarz, E., Seaman, J., Sievert, S., Simpson, J., Skennerton, C. T.,  
423 Spencer, J., Srinivasan, R., Standage, D., Stapleton, J. A., Steinman, S. R., Stein, J.,  
424 Taylor, B., Trimble, W., Wiencko, H. L., Wright, M., Wyss, B., Zhang, Q., and Zyme,  
425 E. (2015). The khmer software package: enabling efficient nucleotide sequence analysis.  
426 *F1000Research*, 4:900.

- 427 Brown, C. T., Howe, A., Zhang, Q., Pyrkosz, A. B., and Brom, T. H. (2012). A  
428 Reference-Free Algorithm for Computational Normalization of Shotgun Sequencing  
429 Data. *arXiv.org*.
- 430 Cox, M. P., Peterson, D. A., and Biggs, P. J. (2010). SolexaQA: At-a-glance quality assess-  
431 ment of Illumina second-generation sequencing data. *BMC Bioinformatics*, 11(1):485.
- 432 Fitzpatrick, M., Ben-Shahar, Y., Smid, H., Vet, L., Vet, L., Robinson, G. E., Sokolowski,  
433 M., and Sokolowski, M. (2005). Candidate genes for behavioural ecology. *Trends In*  
434 *Ecology & Evolution*, 20(2):96–104.
- 435 Garber, M., Grabherr, M. G., Guttman, M., and Trapnell, C. (2011). Computational  
436 methods for transcriptome annotation and quantification using RNA-seq. *Nature Meth-*  
437 *ods*, 8(6):469–477.
- 438 GLENN, T. C. (2011). Field guide to next-generation DNA sequencers. *Molecular Ecology*  
439 *Resources*, 11(5):759–769.
- 440 Guo, Q., Hao, Y.-J., Li, Y., Zhang, Y.-J., Ren, S., Si, F.-L., and Chen, B. (2015). Gene  
441 cloning, characterization and expression and enzymatic activities related to trehalose  
442 metabolism during diapause of the onion maggot *Delia antiqua* (Diptera: Anthomyi-  
443 idae). *Gene*, 565(1):106–115.
- 444 Haas, B. J., Papanicolaou, A., Yassour, M., Grabherr, M., Blood, P. D., Bowden, J.,  
445 Couger, M. B., Eccles, D., Li, B., Lieber, M., MacManes, M. D., Ott, M., Orvis, J.,  
446 Pochet, N., Strozzi, F., Weeks, N., Westerman, R., William, T., Dewey, C. N., Henschel,  
447 R., Leduc, R. D., Friedman, N., and Regev, A. (2013). *De novo* transcript sequence  
448 reconstruction from RNA-seq using the Trinity platform for reference generation and  
449 analysis. *Nature Protocols*, 8(8):1494–1512.
- 450 Heo, Y., Wu, X.-L., Chen, D., Ma, J., and Hwu, W.-M. (2014). BLESS: Bloom filter-  
451 based error correction solution for high-throughput sequencing reads. *Bioinformatics*,  
452 30(10):1354–1362.
- 453 Hiz, M. C., Canher, B., Niron, H., and Turet, M. (2014). Transcriptome analysis of  
454 salt tolerant common bean (*Phaseolus vulgaris* L.) under saline conditions. *PloS one*,  
455 9(3):e92598.

- 456 Iqbal, Z., Caccamo, M., Turner, I., Flicek, P., and McVean, G. (2012). *De novo* assembly  
457 and genotyping of variants using colored *de Bruijn* graphs. *Nature Publishing Group*,  
458 44(2):226–232.
- 459 Jiang, H., Lei, R., Ding, S.-W., and Zhu, S. (2014). Skewer: a fast and accurate  
460 adapter trimmer for next-generation sequencing paired-end reads. *BMC Bioinformatics*,  
461 15(1):182.
- 462 Johnson, J. M., Castle, J., Garrett-Engele, P., Kan, Z., Loerch, P. M., Armour, C. D.,  
463 Santos, R., Schadt, E. E., and Stoughton, Roland Shoemaker, D. D. (2003). Genome-  
464 wide survey of human alternative pre-mRNA splicing with exon junction microarrays.  
465 *Science*, 302(5653):2141–2144.
- 466 Le, H. S., Schulz, M. H., McCauley, B. M., Hinman, V. F., and Bar-Joseph, Z. (2013).  
467 Probabilistic error correction for RNA sequencing. *Nucleic Acids Research*, 41(10):1–11.
- 468 Li, B., Fillmore, N., Bai, Y., Collins, M., Thomson, J. A., Stewart, R., and Dewey, C.  
469 (2014). Evaluation of *de novo* transcriptome assemblies from RNA-Seq data. Technical  
470 report.
- 471 Li, H. (2015). Correcting Illumina sequencing errors for human data. *arXiv.org*.
- 472 Liang, C., Liu, X., Yiu, S.-M., and Lim, B. L. (2013). *De novo* assembly and character-  
473 ization of *Camelina sativa* transcriptome by paired-end sequencing. *BMC Genomics*,  
474 14(1):146.
- 475 Love, M. I., Huber, W., and anders, S. (2014). Moderated estimation of fold change and  
476 dispersion for RNA-Seq data with DESeq2. *bioRxiv.org*.
- 477 Macfarlan, T. S., Gifford, W. D., Driscoll, S., Lettieri, K., Rowe, H. M., Bonanomi, D.,  
478 Firth, A., Singer, O., Trono, D., and Pfaff, S. L. (2012). Embryonic stem cell potency  
479 fluctuates with endogenous retrovirus activity. *Nature*, 487(7405):57–63.
- 480 MacManes, M. D. (2014). On the optimal trimming of high-throughput mRNA sequence  
481 data. *Frontiers in Genetics*, 5.
- 482 MacManes, M. D. and Eisen, M. B. (2013). Improving transcriptome assembly through  
483 error correction of high-throughput sequence reads. *PeerJ*, 1:e113.

- 484 Macmanes, M. D. and Lacey, E. A. (2012). The Social Brain: Transcriptome Assembly  
485 and Characterization of the Hippocampus from a Social Subterranean Rodent, the  
486 Colonial Tuco-Tuco (*Ctenomys sociabilis*). *PloS one*, 7(9):e45524.
- 487 Martin, M. (2011). Cutadapt removes adapter sequences from high-throughput sequencing  
488 reads. *EMBnet.journal*, 17(1):pp. 10–12.
- 489 McDonald, E. and Brown, C. T. (2013). khmer: Working with Big Data in Bioinformatics.  
490 *arXiv.org*.
- 491 Modrek, B., Resch, A., Grasso, C., and Lee, C. (2001). Genome-wide detection of al-  
492 ternative splicing in expressed sequences of human genes. *Nucleic Acids Research*,  
493 29(13):2850–2859.
- 494 Panhuis, T. M. (2006). Molecular evolution and population genetic analysis of candidate  
495 female reproductive genes in *Drosophila*. *Genetics*, 173(4):2039–2047.
- 496 Patro, R., Duggal, G., and Kingsford, C. (2015). Accurate, fast, and model-aware tran-  
497 script expression quantification with Salmon. *bioRxiv.org*, pages 1–35.
- 498 Pell, J., Hintze, A., Canino-Koning, R., Howe, A., Tiedje, J. M., and Brown, C. T.  
499 (2012). Scaling metagenome sequence assembly with probabilistic *de Bruijn* graphs.  
500 *Proceedings of the National Academy of Sciences*, 109(33):13272–13277.
- 501 Robinson, M. D., McCarthy, D. J., McCarthy, D. J., and Smyth, G. K. (2010). edgeR:  
502 a Bioconductor package for differential expression analysis of digital gene expression  
503 data. *Bioinformatics*, 26(1):139–140.
- 504 Shinzato, C., Inoue, M., and Kusakabe, M. (2014). A snapshot of a coral "holobiont":  
505 a transcriptome assembly of the scleractinian coral, porites, captures a wide variety of  
506 genes from both the host and symbiotic zooxanthellae. *PloS one*, 9(1):e85182.
- 507 Simão, F. A., Waterhouse, R. M., Ioannidis, P., Kriventseva, E. V., and Zdobnov, E. M.  
508 (2015). BUSCO: assessing genome assembly and annotation completeness with single-  
509 copy orthologs. *Bioinformatics*, 31(19):3210–3212.
- 510 Simpson, J. T. and Durbin, R. (2012). Efficient *de novo* assembly of large genomes using  
511 compressed data structures. *Genome Research*, 22(3):549–556.

- 512 Smith-Unna, R. D., Boursnell, C., Patro, R., Hibberd, J. M., and Kelly, S. (2015). Tran-  
513 sRate: reference free quality assessment of de-novo transcriptome assemblies. Technical  
514 report.
- 515 Song, L. and Florea, L. (2015). Rcorrector: efficient and accurate error correction for  
516 Illumina RNA-seq reads. *GigaScience*, 4(1):48.
- 517 Song, L., Florea, L., and Langmead, B. (2014). Lighter: fast and memory-efficient se-  
518 quencing error correction without counting. *Genome Biology*, 15(11):509.
- 519 Studholme, D. J. (2010). *De novo* assembly of short sequence reads. *Briefings In Bioin-*  
520 *formatics*, 11(5):457–472.
- 521 Vijay, N., Poelstra, J. W., Künstner, A., Wolf, J. B. W., and Wolf, J. B. W. (2013).  
522 Challenges and strategies in transcriptome assembly and differential gene expression  
523 quantification. A comprehensive *in silico* assessment of RNA-seq experiments. *Molec-*  
524 *ular Ecology*, 22(3):620–634.
- 525 Wolf, J. B. W. (2013). Principles of transcriptome analysis and gene expression quantifi-  
526 cation: an RNA-seq tutorial. *Molecular Ecology Resources*, 13(4):559–572.
- 527 Xie, Y., Wu, G., Tang, J., Luo, R., Patterson, J., Liu, S., Huang, W., He, G., Gu, S.,  
528 Li, S., Zhou, X., Li, Y., Xu, X., Wong, G. K.-S., and Wang, J. (2014). SOAPdenovo-  
529 Trans: *de novo* transcriptome assembly with short RNA-Seq reads. *Bioinformatics*,  
530 30(12):1660–1666.
- 531 Zhang, R., Zhang, L.-l., Ye, X., Tian, Y.-y., Sun, C.-f., Lu, M.-x., and Bai, J.-j. (2013).  
532 Transcriptome profiling and digital gene expression analysis of Nile tilapia (*Oreochromis*  
533 *niloticus*) infected by *Streptococcus agalactiae*. *Molecular biology reports*, 40(10):5657–  
534 5668.
